# Supplementary material
Source: Springer Nature journal article supplement (https://www.springermedizin.de/resource/supplementary/13041_2013_215_MOESM9_ESM.pdf/25657760)

**A**ORT: GSK3 $\alpha$  total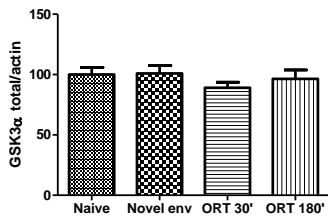ORT: GSK3 $\beta$  total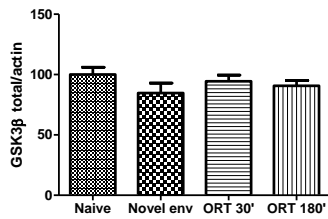ORT: GSK3 $\alpha$  pS21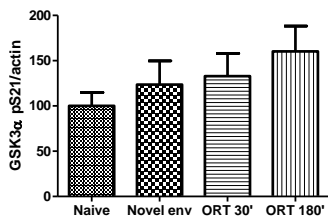ORT: GSK3 $\beta$  pS9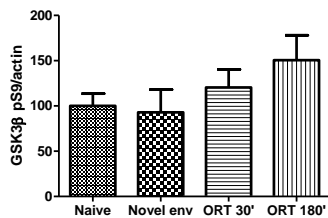ORT: GSK3 $\alpha$  pS21/total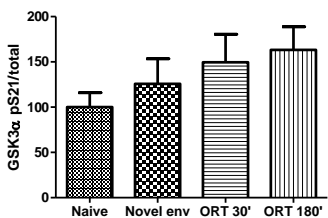ORT: GSK3 $\beta$  pS9/total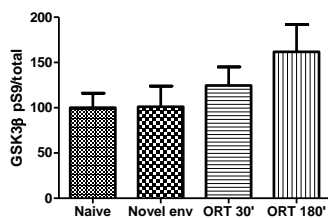ORT: GSK3 $\alpha$  pY279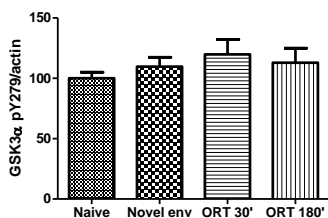ORT: GSK3 $\beta$  pY216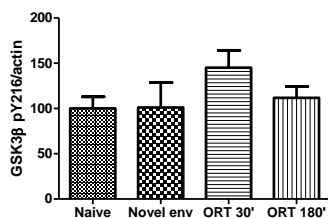ORT: GSK3 $\alpha$  pY279/total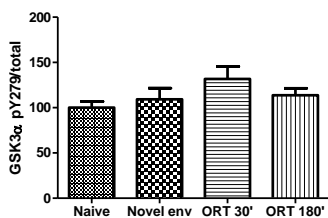ORT: GSK3 $\beta$  pY216/total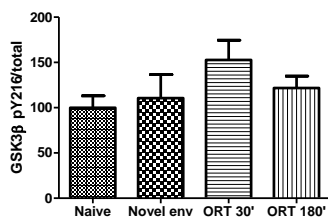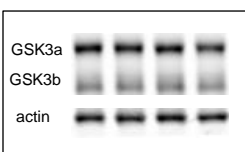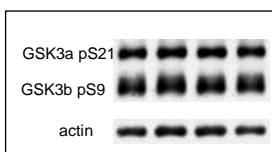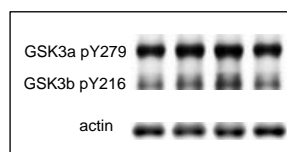**B**

ORT: mTau5

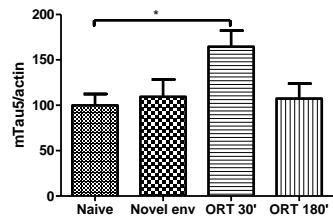

ORT: mAD2

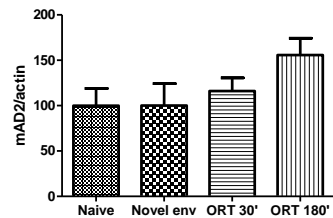

ORT: mAD2/mTau5

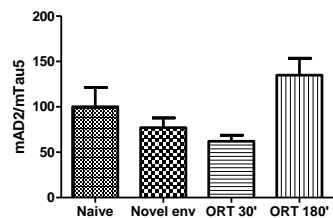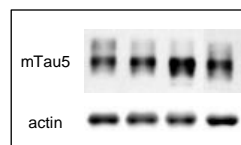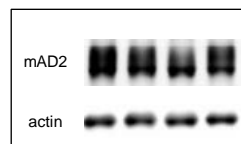

Supplement: MOESM9 [file 25657760]
